# Supplementary material for: Activation of IGF1R/p110β/AKT/mTOR confers resistance to α-specific PI3K inhibition
Source: Springer Nature journal article supplement (doi:10.1186/s13058-016-0697-1), 2016-04-05

# Leroy *et al.* Additional file 1

A

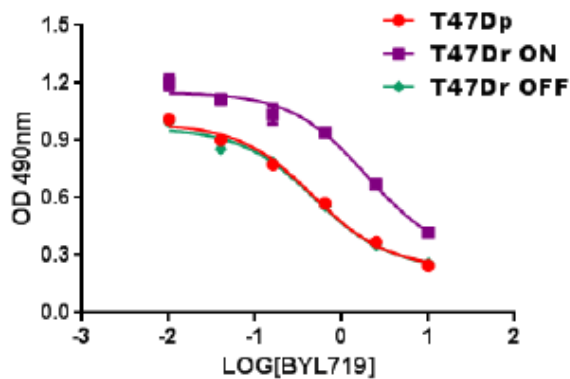

| Gi50 | T47Dp | T47Dr<br>BYL719 ON | T47Dr<br>BYL719 OFF |
|------|-------|--------------------|---------------------|
|      | 0.47  | 1.91               | 0.48                |

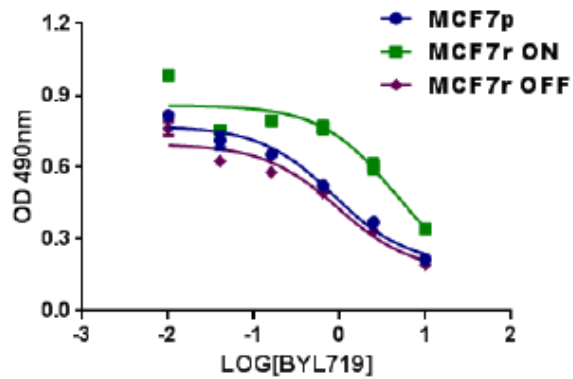

| Gi50 | MCF7p | MCF7r<br>BYL719 ON | MCF7r<br>BYL719 OFF |
|------|-------|--------------------|---------------------|
|      | 0.86  | 4.53               | 0.95                |

B

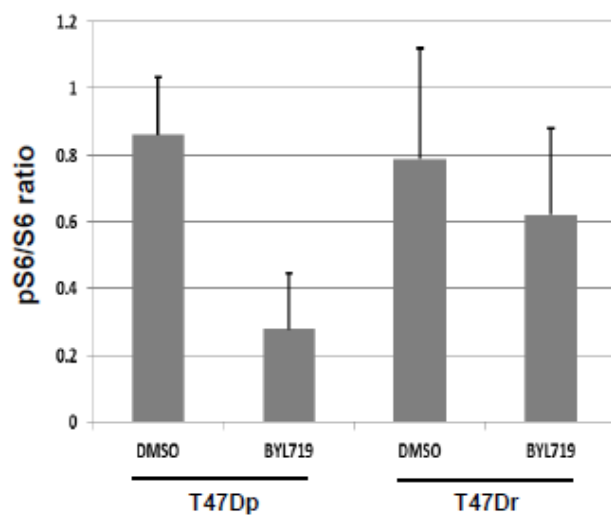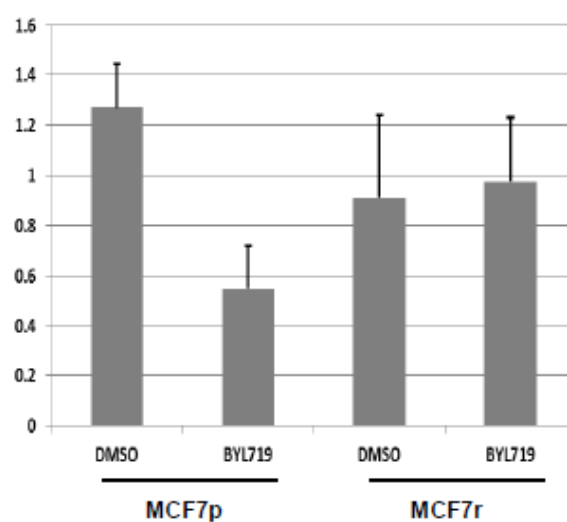

Supplement: MOESM1 [file 10028048]
