# Supplementary material for: Activation of IGF1R/p110β/AKT/mTOR confers resistance to α-specific PI3K inhibition
Source: Springer Nature journal article supplement (doi:10.1186/s13058-016-0697-1), 2016-04-05
Supplement: MOESM2 [file 10028048]

| Gene names | Sequence                     | Variable modifications (position and description) | 147D Resistant - NS -B1L           |                                    | 147D Resistant - NS -B2L           |                                    | 147D Parent - NS -B1L              |                                    | 147D Parent - NS -B2L              |                                    | 147D Parent - NS -B1L              |                                    | 147D Parent - NS -B2L              |                                    |                                    |                                    |          |
|------------|------------------------------|---------------------------------------------------|------------------------------------|------------------------------------|------------------------------------|------------------------------------|------------------------------------|------------------------------------|------------------------------------|------------------------------------|------------------------------------|------------------------------------|------------------------------------|------------------------------------|------------------------------------|------------------------------------|----------|
|            |                              |                                                   | Survive (13135, 147D, Deaminate_1) | Survive (13135, 147D, Deaminate_2) | Survive (13135, 147D, Deaminate_1) | Survive (13135, 147D, Deaminate_2) | Survive (13135, 147D, Deaminate_1) | Survive (13135, 147D, Deaminate_2) | Survive (13135, 147D, Deaminate_1) | Survive (13135, 147D, Deaminate_2) | Survive (13135, 147D, Deaminate_1) | Survive (13135, 147D, Deaminate_2) | Survive (13135, 147D, Deaminate_1) | Survive (13135, 147D, Deaminate_2) | Survive (13135, 147D, Deaminate_1) | Survive (13135, 147D, Deaminate_2) |          |
| ACAP2      | WFSQNNQLVYVQK                |                                                   | 557.31                             | 1153.42                            | 855.365                            | 1240.96                            | 1332.29                            | 1296.625                           | 3649.09                            | 3038.04                            | 3343.565                           | 3356.74                            | 3963.58                            | 3600.16                            | 0.58898                            | -1.50832                           | 0.13052  |
| ACLY       | TFDQVYEGVAGDGR               |                                                   | 92.37                              | 40.43                              | 66.4                               | 597.02                             | 72.36                              | 659.69                             | 145.18                             | 87.97                              | 116.575                            | 703.89                             | 87.01                              | 3.312533                           | -0.25459                           | 1.75234                            |          |
| ACT10      | GVSPVTFIAER                  |                                                   | 3261.39                            | 3676.39                            | 3418.89                            | 2314.39                            | 2274.15                            | 2294.27                            | 9114.58                            | 6517.32                            | 7815.95                            | 483.43                             | 349.46                             | 421.445                            | -0.57549                           | 2446.19                            | -4.213   |
| ADAM8      | HVSPVTPRPFVYANR              |                                                   | 1086.05                            | 1286.05                            | 2105.21                            | 2819.09                            | 2626.26                            | 2626.26                            | 5191.54                            | 5191.54                            | 5256.08                            | 119.9                              | 2380.86                            | 1240.38                            | 1.19                               | 0.00000                            | 0.35227  |
| ADAM9      | FVYVYAAK                     |                                                   | 97.33                              | 134.62                             | 115.975                            | 929.12                             | 518.79                             | 737.455                            | 1223.27                            | 613.21                             | 918.24                             | 285.45                             | 405.54                             | 2.668741                           | 0.862711                           | -1.17903                           |          |
| AFAP1L2    | VAAQPLSLVGGVETDPDPSDHLYSFR   |                                                   | 0                                  | 290.78                             | 145.39                             | 145.15                             | 534.11                             | 339.63                             | 672.25                             | 1045.92                            | 859.085                            | 776.5                              | 779.88                             | 778.19                             | 1.220336                           | -1.19616                           | -0.14268 |
| AGR2       | LAEQPFLLLVYGGCTK             |                                                   | 1865.29                            | 7126.9                             | 640.37                             | 2174.78                            | 222.92                             | 2167.545                           | 29999.76                           | 33002.31                           | 31861.1                            | 2321.16                            | 2374.49                            | 192                                | -1.0535                            | 0.46058                            | -3.76264 |
| AGR2       | HLSPDQGVYFR                  |                                                   | 1692.75                            | 1395.71                            | 153.23                             | 33.71                              | 51.2                               | 42.455                             | 424.23                             | 6205.93                            | 3505.08                            | 26.35                              | 36.4                               | 30.875                             | -1.9013                            | 0.45948                            | -6.85185 |
| AKRY2      | FNLVYQK                      |                                                   | 98.32                              | 69.32                              | 83.32                              | 132.9                              | 156.6                              | 84.945                             | 904.56                             | 75.47                              | 490.175                            | 87.10                              | 130.32                             | 0.019235                           | -0.60209                           | -1.87793                           |          |
| AKR7A2     | FVYAPFLAGLLTK                |                                                   | 1                                  | 1                                  | 1                                  | 5.33                               | 0.32                               | 2.825                              | 340.03                             | 368.31                             | 36.17                              | 36.17                              | 1                                  | 1                                  | 1.89251                            | 4.98251                            | -8.51637 |
| ANKK1A     | EQGQPELLLTAEK                |                                                   | 10428.1                            | 7777                               | 9103.37                            | 3767.67                            | 3717.19                            | 3759.93                            | 51.87                              | 5403.37                            | 5326.34                            | 20763.65                           | 29566.66                           | 233684.1                           | 2.04281                            | 0.68206                            | 2.137426 |
| ANKK1A     | EDEHPHLLTAEK                 |                                                   | 3877.87                            | 4931.91                            | 4404.89                            | 1001.33                            | 896.67                             | 949                                | 2427.11                            | 2620.79                            | 2623.35                            | 1825.85                            | 1605.56                            | 2.21463                            | -0.7586                            | -0.70866                           |          |
| ANKK1A     | IHGSAAREEEDHPHLLTAEK         |                                                   | 21985                              | 25021.39                           | 23503.2                            | 1027.09                            | 1205.99                            | 1116.49                            | 20817.57                           | 20449.13                           | 20633.35                           | 2220.7                             | 2555.43                            | 3388.065                           | -4.35851                           | -1.09687                           | -1.11106 |
| ANKK2      | NTYVDFEAREDEHPHLLTAEK        |                                                   | 5647.32                            | 5838.26                            | 5742.79                            | 44.85                              | 78.77                              | 61.81                              | 6727.11                            | 4566.97                            | 6302.04                            | 109.7                              | 112.01                             | 110.885                            | -0.53777                           | -0.84276                           | -0.78018 |
| ANKX2P     | NTYVDFEAREDEHPHLLTAEK        |                                                   | 5747.59                            | 5707.08                            | 7722.35                            | 4844.21                            | 5911.1                             | 5376.91                            | 15593.63                           | 12989.1                            | 14166.36                           | 9862                               | 85529                              | 9134.34                            | 1.78951                            | 0.78951                            | 0.26553  |
| ANKX2P     | ALLYLGGDD                    |                                                   | 113.3                              | 24.51                              | 68.905                             | 7.5                                | 115.52                             | 62.51                              | 785.74                             | 73.45                              | 449.45                             | 40.215                             | 43.405                             | -0.14052                           | -2.79022                           | -0.7819                            |          |
| ANKX2P     | LYLYYQDQTK                   |                                                   | 2673.23                            | 2154.04                            | 2413.635                           | 1902.81                            | 2342.94                            | 2122.875                           | 3621.48                            | 4331.88                            | 3976.68                            | 1419.04                            | 1698.22                            | 1558.63                            | -0.18519                           | 0.445741                           | -1.31219 |
| ANKX2P     | ATYVDFEAREDEHPHLLTAEK        |                                                   | 10945.08                           | 1847.73                            | 15296.25                           | 7083.62                            | 6821.26                            | 6852.53                            | 7418.18                            | 7845.6                             | 7845.6                             | 2509.24                            | 2449.5                             | 1.866                              | -1.186                             | 1.46917                            | -1.63972 |
| ANKX5      | SLLVYQK                      |                                                   | 346.05                             | 246.55                             | 296.3                              | 650.74                             | 1218.13                            | 934.435                            | 1225.04                            | 1178.425                           | 1005.76                            | 866.2                              | 95.8                               | 16.0736                            | -0.10287                           | -0.32986                           |          |
| ARAP2      | MDPPIYVAK                    |                                                   | 146.8                              | 338.26                             | 242.53                             | 2954.95                            | 2407.44                            | 2781.195                           | 11.77                              | 80.065                             | 76.11                              | 251.06                             | 43.065                             | 3620.855                           | 3.51947                            | -0.30863                           | 2.06858  |
| ARHGAP35   | NEEDNYVSPHDSGQK              |                                                   | 19586.4                            | 22827.9                            | 21249.1                            | 45181.69                           | 290191                             | 370905                             | 434260.1                           | 470322.6                           | 435644.8                           | 419403.5                           | 463223.2                           | 8041136                            | -0.29683                           | 0.66882                            | 0.66882  |
| ARHGEF10L  | EQGQPELLLTAEK                |                                                   | 761.82                             | 701.2                              | 731.1                              | 6101.38                            | 6329.7                             | 6329.7                             | 5101.54                            | 5191.54                            | 5256.08                            | 4729.37                            | 34003.87                           | 4064.1                             | 3.09439                            | 0.65279                            | -0.31197 |
| ARPC3      | TDIDVDEYAEK                  |                                                   | 55.12                              | 238.99                             | 147.055                            | 1347.88                            | 1222.93                            | 1285.405                           | 2354.55                            | 1904.66                            | 2139.605                           | 2494.42                            | 2490.165                           | 3.127795                           | -1.218                             | 0.48639                            |          |
| ATP13A1    | QFLVAFVPGVNFYSQNSR           |                                                   | 638.68                             | 2916.62                            | 1876.15                            | 5695.56                            | 6418.6                             | 6007.08                            | 15161.43                           | 12712.84                           | 11877.314                          | 21689.72                           | 27624.31                           | 24857.02                           | 1.678889                           | -2.03726                           | 0.823064 |
| ATP13A1    | HLSPDQGVYFR                  |                                                   | 265.23                             | 60.48                              | 162.275                            | 50.74                              | 45.2                               | 50.7                               | 312.01                             | 312.01                             | 362.96                             | 362.96                             | 431.11                             | 1.16                               | 0.44605                            | 0.46451                            |          |
| ATP13A1    | LQSTDLVAAVK                  |                                                   | 193.21                             | 33.89                              | 113.55                             | 315.34                             | 135.79                             | 225.565                            | 517.58                             | 123.58                             | 320.58                             | 25.79                              | 43.05                              | 346.87                             | 0.990216                           | -0.6088                            | 0.113711 |
| ATP13A1    | GIIVYTDGR                    |                                                   | 63826.85                           | 5940.78                            | 59883.82                           | 13818.21                           | 131144.8                           | 134665                             | 132762.3                           | 142016.3                           | 137389.3                           | 41695.27                           | 37890.08                           | 39702.68                           | 1.16937                            | -1.78787                           | -0.87278 |
| ATP5B      | VDLLLAFYAK                   |                                                   | 129.43                             | 214.14                             | 171.795                            | 1.1                                | 1.1                                | 1.488                              | 384.47                             | 436.335                            | 1.1                                | 1.1                                | 1.1                                | 1.1                                | -7.42446                           | 0.0                                | -8.70268 |
| ATP5B      | HALLENPPADIAWYAK             |                                                   | 240.1                              | 988.28                             | 590.37                             | 377.53                             | 317.78                             | 347.66                             | 1329.04                            | 1512.37                            | 1536.04                            | 515.63                             | 288.9                              | 392                                | 1.1                                | -1.7351                            | -0.37278 |
| BCAR1      | VDPVLLVPPVSEK                |                                                   | 37.57                              | 426.06                             | 399.315                            | 2831.64                            | 3170.81                            | 3170.81                            | 161.695                            | 161.695                            | 161.695                            | 161.695                            | 2339.92                            | 1.995                              | 2.99094                            | 0.588783                           | 0.76728  |
| BCAR1      | RLGGPQDLYDVPK                |                                                   | 26352                              | 30638.39                           | 28494.02                           | 53772.5                            | 40318.85                           | 47045.68                           | 24384.37                           | 16742.8                            | 20653.99                           | 29474.01                           | 26110.52                           | 27792.27                           | 0.72403                            | 0.79379                            | 0.434592 |
| BCAR1      | SCATEYVDFYFAK                |                                                   | 122985.1                           | 20885.08                           | 1601.31                            | 22176.3                            | 222019.7                           | 22191.9                            | 14855.4                            | 12869.4                            | 12869.4                            | 14855.4                            | 12869.4                            | 14855.4                            | 1.28694                            | 0.26553                            | 0.26553  |
| BCAR1      | HLLPQGGDLYDVPVPR             |                                                   | 132627.7                           | 12713.3                            | 126969.5                           | 198461.6                           | 180746.2                           | 189693.9                           | 140631.5                           | 125335.9                           | 143681.7                           | 173846.3                           | 159103.6                           | 107481.6                           | 0.253022                           | 0.258717                           | 0.258717 |
| BCAR1      | GLPPSNHAAVYDVPSPVSK          |                                                   | 664251                             | 55838.28                           | 51155.4                            | 78990.44                           | 88002.13                           | 83496.29                           | 73849.98                           | 64340.27                           | 61905.3                            | 79811.49                           | 84559.79                           | 821364.07                          | 0.062826                           | 0.02861                            | 0.250267 |
| BCAR1      | AQDQLVQVPGSPVDFVPPVPPAER     |                                                   | 49782.57                           | 78338.33                           | 73881.65                           | 124065.3                           | 97748.38                           | 110906.3                           | 110381                             | 124577.3                           | 117492.3                           | 127412                             | 148588.9                           | 193335                             | 0.584109                           | -0.28506                           | 0.202001 |
| BCAR1      | LVLPFEVADGVVDSGVVAFVPPAER    |                                                   | 152219.2                           | 169799.6                           | 161539.6                           | 178544.6                           | 178544.6                           | 139899.6                           | 139899.6                           | 139899.6                           | 139899.6                           | 139899.6                           | 139899.6                           | 139899.6                           | 1.398996                           | 0.0                                | 0.0      |
| BCAR3      | CLEEHYTGSPQGR                |                                                   | 0                                  | 14.56                              | 7.28                               | 106.95                             | 0                                  | 0.5475                             | 17.45                              | 0                                  | 8.725                              | 15.59                              | 0                                  | 77.695                             | 0.276854                           | -0.58986                           | 3.15495  |
| BCAR3      | VPPSSRAVNSLSEAYCEVLPFAATGCGR |                                                   | 4002.06                            | 18940.34                           | 11471.2                            | 9884.18                            | 8429.05                            | 9156.615                           | 6871.29                            | 6416.48                            | 6643.88                            | 5779.48                            | 6477.16                            | 6128.32                            | -0.28513                           | 0.579323                           | -0.11654 |
| BCR        | HQSGPDAEAEKQFVYVDFEARE       |                                                   | 4312.15                            | 5698.44                            | 5020.785                           | 2866.39                            | 2626.21                            | 2492.3                             | 1822.42                            | 9222.75                            | 13822.64                           | 9344.54                            | 1169.39                            | 3.30347                            | 1.98344                            | 0.623791                           |          |
| C11orf52   | SPGMSDELNHADYVQSRPFAK        |                                                   | 1377.1                             | 1707.04                            | 1542.07                            | 97430.97                           | 101356.9                           | 99398.95                           | 1873.49                            | 1100.73                            | 1487.51                            | 23249.79                           | 24054.51                           | 23652.15                           | 6.101929                           | 2.071259                           | 3.91189  |
| C11orf52   | HVHLENATAYLR                 |                                                   | 27472.14                           | 31115.42                           | 29293.78                           | 146999.4                           | 145711.5                           | 146202.9                           | 40212.19                           | 34366.85                           | 32723.44                           | 23669.57                           | 23669.57                           | 23669.57                           | 2.30936                            | 2.504229                           | -0.5373  |
| C3orf78    | NAEDQLYVFNIR                 |                                                   | 882.09                             | 301.89                             | 591.99                             | 2494.06                            | 2247.44                            | 2370.75                            | 4486.14                            | 4174.6                             | 4330.37                            | 4311.49                            | 5006.69                            | 4659.09                            | 2.16997                            | -0.9747                            | 1.05558  |
| CALC1      | AA4AAKSGDPIYVQAEK            |                                                   | 2654.1                             | 2758.05                            | 2622.76                            | 50.74                              | 4762.04                            | 4762.04                            | 1959.81                            | 1959.81                            | 2036.15                            | 2329.47                            | 2329.47                            | 2329.47                            | 1.1                                | 0.44605                            | 0.46451  |
| CALM2      | VFDKNGVYVSEK                 |                                                   | 91.04                              | 60.67                              | 390.855                            | 1022.97                            | 1114.32                            | 1068.645                           | 1461.52                            | 1288.16                            | 1288.16                            | 1290.32                            | 105.79                             | 1.41077                            | -0.03619                           | -0.32752                           |          |
| CALR       | FVLSASFEFFSK                 |                                                   | 717.85                             | 1324.91                            | 1021.38                            | 74.27                              | 109.08                             | 91.675                             | 3656.2                             | 3425.19                            | 3509.58                            | 34.24                              | 0                                  | 17.12                              | -3.47785                           | 2.20846                            | -7.69221 |
| CALR       | WVHFVYK                      |                                                   | 50.74                              | 144.82                             | 100.92                             | 13.21                              | 0                                  | 0                                  | 6.855                              | 292.72                             | 299.998                            | 290.336                            | 0                                  | 0                                  | -3.87991                           | 2.77759                            | -11.5316 |
| CANX       | VPIVTEGVYVDFSDR              |                                                   | 598.63                             | 910.26                             | 628.14                             | 443.76                             | 367.33                             | 347.33                             | 1512.37                            | 1512.37                            | 1536.04                            | 515.63                             | 288.9                              | 392                                | 1.1                                | -1.866                             | -0.36983 |
| CARKD      | IGVGGQVQGFYGFAYFAIAK         |                                                   | 12464.34                           | 45246.28                           | 28855.31                           | 37031.8                            | 30948.16                           | 33889.88                           | 27027.48                           | 22747.74                           | 24878.61                           | 24385.39                           | 23045.29                           | 27365.34                           | 0.26273                            | 0.31276                            | 1.03622  |
| CASKIN2    | NTYVDFEAREDEHPHLLTAEK        |                                                   | 3388.69                            | 981.82                             | 6599.45                            | 13861.98                           | 14677.66                           | 14254.82                           | 9702.82                            | 8195.78                            | 8987.35                            | 13981.12                           | 103345                             | 13650.24                           | 1.11033                            | 0.06254                            | 0.694044 |
| CBL        | KPSSANNSLAARPLVFK            |                                                   | 269.33                             | 862.31                             | 862.31                             | 862.31                             | 862.31                             | 862.31                             | 862.31                             | 862.31                             | 862.31                             | 862.31                             | 862.31                             | 862.31                             | 0.86231                            | 0.86231                            | 0.86231  |
| CCK1       | HSLSEVLEAK                   |                                                   | 162.15                             | 41.79                              | 101.97                             | 21.07                              | 14.64                              | 17.855                             | 3161.73                            | 3073.76                            | 3117.34                            | 990.8                              | 38.7                               | 54.585                             | -2.5174                            | -4.5307                            | -2.51727 |
| CDK1       | IGEGYGVVYK                   |                                                   | 605207.4                           | 57001.2                            | 591612.3                           | 511060.2                           | 544110.1                           | 447806.2                           | 704621.2                           | 608060.2                           | 666136.2                           | 652231.4                           | 628060.2                           | 6405188                            | 2.919512                           | -0.45716                           | -0.1038  |
| CDK1       | IGEGYGVVYK                   |                                                   | 666.43                             | 731.04                             | 699.735                            | 237.89                             | 465.16                             | 381.525                            | 5863.23                            | 4251.47                            | 5057.35                            | 3141.04                            | 5141.03                            | -0.87503                           | -3.44014                           | -0.28839</                         |          |

|             |                                            |                               |          |          |          |          |          |           |          |          |          |          |            |          |          |          |          |
|-------------|--------------------------------------------|-------------------------------|----------|----------|----------|----------|----------|-----------|----------|----------|----------|----------|------------|----------|----------|----------|----------|
| GLU01_Y512  | DIVHGLAYTMR                                | Phospho(Y)                    | 315.09   | 278.72   | 296.805  | 21065.25 | 22491.87 | 21778.56  | 294.88   | 318.23   | 306.55   | 10348.39 | 7411.11    | 8879.75  | 6.196763 | 1.294318 | 4.856301 |
| GOLGA4      | EEREKLTENVYSBK                             | Phospho(Y)Phospho(ST)         | 1410.74  | 1047.97  | 1229.355 | 5201.84  | 4282.72  | 4742.29   | 337.03   | 186.58   | 261.895  | 107.43   | 87.74      | 92.585   | 1.947679 | 5.678959 | -1.49964 |
| GOLGA5      | NTDTYELKQNTLDYTGPK                         | Phospho(Y)                    | 376.1    | 243.24   | 270.78   | 4887.72  | 3027.07  | 4420.57   | 4298.57  | 505.94   | 272.35   | 570.96   | 400.62     | 386.07   | 2.5277   | 6.05975  | 0.83333  |
| GRPC5C      | VPSEAGLNLVPR                               | Phospho(Y)                    | 882.85   | 4318.4   | 4070.625 | 9527.24  | 8131.7   | 8829.47   | 7126.58  | 6796.35  | 6961.465 | 1572.55  | 1774.64    | 1816.11  | 1.170777 | -1.04045 | 1.383388 |
| GRPC5C_Y414 | AEDMYSQA0SHOATPPK                          | Phospho(Y)                    | 28.7     | 25.28    | 26.9     | 176.64   | 181.47   | 481.05    | 0.08     | 10.02    | 0.05     | 35.96    | 74.40      | 417.7    | 1.165754 | 0.20784  | 0.32046  |
| GSK3A       | PEMYSVYSIK                                 | Phospho(Y)                    | 1026798  | 1045200  | 1036999  | 2561966  | 3229987  | 2895777   | 2503680  | 2243350  | 2391515  | 2700005  | 3199400    | 2329982  | 1.482227 | -0.01643 | 0.22646  |
| GSK3B       | LDLDFPVLVLDGK                              | Phospho(Y)                    | 286.74   | 1981.84  | 2100.6   | 1500.0   | 1027.7   | 80.2      | 23.4     | 90.2     | 23.4     | 51.6     | 23.4       | 51.6     | 23.4     | 51.6     | 23.4     |
| HARS        | LDLDDKGGELLSLR                             | Phospho(Y)                    | 129.44   | 38.28    | 25.56    | 566.56   | 456.52   | 51.54     | 94.39    | 112.85   | 102.12   | 125.14   | 182.11     | 1188.65  | 1.00185  | -1.21646 | 0.20937  |
| HADC10      | EEALTLAKGLLDDMLDGDVNSGIATPASAAATLADLVAR    | Phospho(ST)Phospho(ST)Phospho | 14123.24 | 77.28    | 210.26   | 2569.54  | 5.37     | 1287.455  | 127.86   | 337.64   | 232.65   | 3.66     | 932.74     | 4918.2   | -2.46335 | -1.93381 | 4.01897  |
| HIPK2       | FCYFQYLCYR                                 | Phospho(Y)                    | 678.93   | 647.77   | 610.25   | 1402.56  | 1027.67  | 1402.56   | 1027.67  | 1402.56  | 1027.67  | 1402.56  | 1027.67    | 1402.56  | 1027.67  | 1402.56  | 1027.67  |
| HIPK3       | AVCSYTLQSR                                 | Phospho(Y)                    | 734.2    | 13430.08 | 10377.14 | 31919.71 | 38946.7  | 35073.21  | 58612.42 | 58582.81 | 58782.62 | 38077.25 | 6223.02    | 30664.29 | 1.75696  | 0.19381  | -0.93883 |
| HIST1H2B    | TSVSYTLQSR                                 | Phospho(Y)                    | 3046.99  | 2813.96  | 2937.45  | 10460.44 | 9403.05  | 9403.05   | 14585.69 | 16586.18 | 15586    | 1077.23  | 2531.37    | 16820.01 | 0.11940  | -0.84845 | 0.43475  |
| HIST1H4     | ESYVYVYK                                   | Phospho(Y)                    | 0.03     | 101.09   | 50.56    | 0        | 2.81     | 14.05     | 675.87   | 935.65   | 305.76   | 29.71    | 0          | 14.855   | -5.16935 | -3.40231 | -5.76133 |
| HIST2HB     | SGCLFVEETR                                 | Phospho(Y)                    | 3489.32  | 5720.37  | 4604.86  | 9603.43  | 10096.24 | 10096.24  | 10096.24 | 10096.24 | 10096.24 | 10096.24 | 10096.24   | 10096.24 | 10096.24 | 10096.24 | 10096.24 |
| HMEB1       | ESYVYVYK                                   | Phospho(Y)                    | 1171.98  | 1058.33  | 1115.155 | 61.95    | 121.45   | 91.7      | 4033.43  | 2827.18  | 3433.305 | 48.09    | 63.09      | 55.808   | -1.80148 | 0.72226  | -5.94763 |
| HNRNP42B1   | RPPSAFFLFCSEYR                             | Phospho(Y)                    | 1002.57  | 1164.63  | 1083.6   | 5201.91  | 479.6    | 500.255   | 1024.7   | 1227.18  | 1125.94  | 349.04   | 376.27     | 362.655  | -1.151   | 0.464066 | -1.63446 |
| HNRNP42B1   | NGDPSGGVYVPGGSSGGSSGVYGR                   | Phospho(Y)                    | 434.85   | 32.75    | 23.8     | 7892.35  | 6136.64  | 8939.485  | 195.19   | 32.75    | 195.19   | 3697.36  | 6372.52    | 5120.24  | 0.33209  | 5.55146  | 0.2242   |
| HNRNP41     | ATDFINDFSPNLVPR                            | Phospho(Y)                    | 31.79    | 832.88   | 602.48   | 302.49   | 495.38   | 398.935   | 1123.95  | 1117.97  | 1120.96  | 176.76   | 176.76     | 154.07   | 0.15411  | -0.59471 | 0.339802 |
| HSP90A1     | HIYITGETK                                  | Phospho(Y)                    | 1997.15  | 1894.81  | 1945.98  | 800.14   | 1020.52  | 910.33    | 11998.72 | 11751.55 | 11875.14 | 1292.41  | 1312.94    | 1302.675 | -1.09604 | -0.57102 | -1.3839  |
| HSP90A1     | HSGFVPTFLVEK                               | Phospho(Y)                    | 1275.65  | 2892.98  | 2948.21  | 22.51    | 136.14   | 79.25     | 4652.19  | 4712.02  | 4862.105 | 1.57     | 60.68      | 32.925   | -1.56759 | 1.26592  | -7.15183 |
| HSP90A2     | HSYVITVFLYK                                | Phospho(Y)                    | 152.12   | 593.41   | 593.41   | 593.41   | 593.41   | 593.41    | 593.41   | 593.41   | 593.41   | 593.41   | 593.41     | 593.41   | 593.41   | 593.41   | 593.41   |
| HSP90A2B2   | SIYITGESK                                  | Phospho(Y)                    | 79.01    | 49.76    | 64.385   | 78.7     | 22.02    | 128.3     | 1107.25  | 777.25   | 942.2    | 58.08    | 33.8       | 98.29    | 0.994725 | 0.384005 | -3.62602 |
| HSP90B1     | DISTNYV43QK                                | Phospho(Y)                    | 777.02   | 606.09   | 691.555  | 251.56   | 33.5     | 291.53    | 509.24   | 569.26   | 584.92   | 106.10   | 828.92     | 1167.52  | -1.2462  | -2.07073 | -3.23274 |
| HSP90B1     | AHAGDGLTYVSCVGFQHK                         | Phospho(ST)                   | 890.11   | 510.126  | 1493.395 | 356.49   | 1058.08  | 1010.255  | 515.58   | 1485.07  | 951.35   | 1213.12  | 1653.19    | 1407.155 | -0.47002 | 0.494765 | 0.22888  |
| HSP90B1     | ELEOVNPIGSLVQAGGPGGGGQAQPK                 | Phospho(Y)                    | 692.74   | 20000.54 | 13411.64 | 5171.9   | 4774.59  | 49373.245 | 26865.17 | 23218.32 | 24851.75 | 6874.02  | 8008.83    | 7451.275 | -1.43123 | -0.583   | -1.74358 |
| HSP90B1     | TFPSVFAFDTDR                               | Phospho(Y)                    | 1214.82  | 2188.9   | 1701.86  | 50.76    | 9.7      | 73.23     | 5224.06  | 3533.91  | 4378.85  | 24.61    | 201.33     | 227.7    | -0.5353  | -1.62435 | -4.27767 |
| HSP90B1     | HEFVWVWAGAT                                | Phospho(Y)                    | 1152.71  | 713.54   | 933.125  | 2975.13  | 3203.36  | 3089.245  | 1271.07  | 1566.61  | 1318.84  | 4511.61  | 4943.81    | 4727.71  | 1.727112 | -0.19389 | 1.841782 |
| HSP90B1     | YTHAVVYVYVNDVPR                            | Phospho(Y)                    | 5131.17  | 5029.25  | 26       | 34.26    | 41.47    | 34.26     | 41.47    | 34.26    | 41.47    | 173.3    | 20.9       | 163.48   | 0.22479  | 0.14924  | 0.25088  |
| HSP90B1     | ITDSVYVPEGR                                | Phospho(Y)                    | 2142.51  | 71.57    | 202.255  | 39.68    | 25.54    | 32.41     | 404.47   | 3266.52  | 3655.495 | 0        | 2.31       | 11.55    | -0.32711 | 1.497422 | -3.80603 |
| HSP90B1     | GAFTVGLDGLTYVSCVGFQHK                      | Phospho(Y)                    | 5188.22  | 9526.98  | 7357.6   | 4784.76  | 4366.62  | 5897.5    | 8294.84  | 6105.44  | 4545.07  | 4688.01  | 4615.4     | -0.7522  | -0.02829 | 0.47654  |          |
| HSP90B1     | OPVSGYDKPHVLLDLDVDSQK                      | Phospho(Y)                    | 0        | 85.7     | 44.285   | 700.52   | 725.275  | 271.24    | 185.15   | 228.156  | 1401.01  | 1552.478 | 1478.125   | 4.03368  | -1.02717 | 2.695492 | 0.4246   |
| HSP90B1     | YSYVITVFLYK                                | Phospho(Y)                    | 83.27    | 128.79   | 54.03    | 198.95   | 193.9    | 547.76    | 193.9    | 547.76   | 193.9    | 1387.43  | 1183.20    | 1290.9   | 1.29693  | 1.82934  | 0.94265  |
| IT27        | ASDGAHFQKSYLLTGLMDLVK                      | Phospho(Y)Phospho(ST)         | 91354.19 | 1467596  | 91355.1  | 197454   | 182040   | 1901967   | 1044428  | 901030.5 | 97272.94 | 1078583  | 1067552    | 1071868  | 0.675857 | 0.827365 | 1.040016 |
| IT27        | SGDGAHFQKSYLLTGLMDLVK                      | Phospho(Y)                    | 95811.36 | 68854.25 | 82332.81 | 94588.34 | 96209.84 | 95309.09  | 76183.4  | 70256.49 | 93719.56 | 62626.72 | 62652.66   | 62688.79 | 0.211146 | 0.604406 | -0.22403 |
| IT27        | SGDGAHFQKSYLLTGLMDLVK                      | Phospho(ST)                   | 1452.91  | 15222.69 | 1515.9   | 1609.49  | 1635.62  | 1635.62   | 1635.62  | 1635.62  | 1635.62  | 1635.62  | 1635.62    | 1635.62  | 1635.62  | 1635.62  | 1635.62  |
| IGF1R       | DIVETDYRK                                  | Phospho(Y)                    | 1583.98  | 86.76    | 1232.37  | 10142.41 | 13158.36 | 11650.39  | 8963.77  | 8837.25  | 8600.51  | 6635.37  | 6330.58    | 6482.97  | 3.24087  | 0.84565  | -0.45723 |
| IGF1R       | DIVETDYRK                                  | Phospho(Y)Phospho(ST)         | 111.57   | 46.45    | 79.01    | 10489.05 | 12786.73 | 11637.89  | 17339.31 | 15480.49 | 18409.9  | 6034.02  | 4125.525   | 5226.75  | 7.020579 | 1.15541  | -1.65117 |
| INPPL1      | LFVNSDKDEAGK                               | Phospho(Y)                    | 45.58    | 99.65    | 77.585   | 1141.58  | 1161.49  | 1151.535  | 50.15    | 38.7     | 44.63    | 51.26    | 63.181     | 572.465  | 3.80209  | 1.00629  | 3.97328  |
| INPPL1      | RLVNSDKDEAGK                               | Phospho(Y)                    | 1075.68  | 1058.29  | 1058.29  | 1058.29  | 1058.29  | 1058.29   | 1058.29  | 1058.29  | 1058.29  | 1058.29  | 1058.29    | 1058.29  | 1058.29  | 1058.29  | 1058.29  |
| INPPL1      | LFVNSDKDEAGK                               | Phospho(Y)                    | 18635.14 | 4648.92  | 32493.03 | 82508.59 | 86023.18 | 84265.89  | 62508.41 | 54781.74 | 58645.08 | 41748.36 | 4258.85    | 47215.11 | 1.374818 | 0.8357   | -0.31276 |
| IGKAP1      | LGQAPDQDLYK                                | Phospho(Y)                    | 464.03   | 30.33    | 382.68   | 560.36   | 612.77   | 586.565   | 473.15   | 515.74   | 494.43   | 562.91   | 889.75     | 726.33   | 0.616152 | -0.30833 | 0.554899 |
| IGKAP1      | FEELSNNYKMDQK                              | Phospho(Y)                    | 21       | 0        | 0        | 0        | 0        | 0         | 0        | 0        | 0        | 0        | 0          | 0        | 0        | 0        | 0        |
| IRS1_Y612   | GGHRRPDSSTLDDGVMPPSGVAVPSGR                | Phospho(Y)                    | 92.39    | 73.34    | 82.865   | 21832.47 | 27538.35 | 24685.41  | 110.04   | 32.7     | 71.655   | 4531.03  | 2264.33    | 3379.23  | 8.21888  | 2.869315 | 5.59506  |
| ITSN1       | WDGTEYVYK                                  | Phospho(Y)                    | 843.54   | 1042.31  | 942.925  | 1517.81  | 1722.87  | 1620.34   | 2468.87  | 3786.57  | 3172.72  | 2218.63  | 1787.19485 | 666.08   | 1.01292  | -0.29619 | -0.86283 |
| ITSN1       | EEPEALYAVYK                                | Phospho(Y)                    | 1507.22  | 1516.13  | 1511.875 | 7041.33  | 7638.71  | 7340.02   | 2584.84  | 2056.62  | 2170.73  | 2887.2   | 3100.02    | 2930.61  | 2.779636 | 1.23889  | 3.70358  |
| ITSN1       | LVLYPELVEK                                 | Phospho(Y)                    | 573.96   | 483.84   | 516      | 1111.23  | 1771.59  | 1357.44   | 1357.44  | 1357.44  | 1357.44  | 1357.44  | 1357.44    | 1357.44  | 1357.44  | 1357.44  | 1357.44  |
| ITSN1       | REPEALYAVYK                                | Phospho(Y)                    | 5166.21  | 6375.17  | 5780.69  | 34326.47 | 37181.01 | 35734.4   | 107743   | 125338   | 116540.9 | 49301.76 | 50150.33   | 49726.05 | 2.62871  | 2.846021 | -1.22876 |
| KATNAL2     | GLTYVPGPTGK                                | Phospho(Y)                    | 1285.84  | 1263.07  | 1295.455 | 222.69   | 411.97   | 317.28    | 2521.66  | 3455.48  | 2988.97  | 366.87   | 571.45     | 469.16   | -1.98893 | -0.56432 | -2.6713  |
| KIAA1217    | GLTYVADPLVHEGR                             | Phospho(Y)                    | 1452.91  | 15222.69 | 1515.9   | 1609.49  | 1635.62  | 1635.62   | 1635.62  | 1635.62  | 1635.62  | 1635.62  | 1635.62    | 1635.62  | 1635.62  | 1635.62  | 1635.62  |
| KIAA1217    | NYVYELNDR                                  | Phospho(Y)                    | 12440.06 | 13281.08 | 12865.07 | 23642.27 | 22194.53 | 22918.4   | 19700.15 | 17036.06 | 18358.11 | 12050.75 | 13947.26   | 12999.01 | 0.833047 | 0.818105 | -0.4988  |
| LAS1        | RLPEQOQPHIPTSAPVYQOQPOQVQAQSYGKYKPEAFVPSQR | Phospho(Y)                    | 1310.59  | 17245.83 | 15173.71 | 20450.77 | 16132.34 | 18291.56  | 19921.26 | 16948.91 | 18369.19 | 17984.22 | 16921.81   | 17453.02 | 0.269604 | 0.607701 | -0.4988  |
| LDHA        | DVNLHLKEQTPQK                              | Phospho(Y)                    | 5988.93  | 10236.19 | 8112.56  | 7706.51  | 8436.08  | 8071.295  | 1730.97  | 12188.49 | 12569.73 | 10881.79 | 11905.79   | 11393.79 | -0.00736 | -0.49738 | -1.8579  |
| LDHA        | LDVNLKLLKQTPQK                             | Phospho(Y)                    | 1444.84  | 4107.81  | 4107.81  | 4107.81  | 4107.81  | 4107.81   | 4107.81  | 4107.81  | 4107.81  | 4107.81  | 4107.81    | 4107.81  | 4107.81  | 4107.81  | 4107.81  |
| LDGAL3      | VDVNDHLLQYK                                | Phospho(Y)                    | 2645.32  | 2374.84  | 2510.08  | 0        | 44.75    | 23.75     | 2        |          |          |          |            |          |          |          |          |

|             |                                   |             |          |          |          |          |          |          |          |          |          |          |          |          |           |          |           |
|-------------|-----------------------------------|-------------|----------|----------|----------|----------|----------|----------|----------|----------|----------|----------|----------|----------|-----------|----------|-----------|
| SDC4        | KAPTFEYFA                         | Phospho(Y)  | 1286.34  | 1141.75  | 1214.045 | 3793.69  | 3797.88  | 3795.785 | 4159.33  | 3271.56  | 3715.445 | 3635.48  | 2772.91  | 3204.195 | 1.644576  | 0.244436 | -0.21357  |
| SDCBP       | LVPELSQYMLSLNEEER                 | Phospho(Y)  | 34.64    | 32.72    | 33.68    | 41.38    | 93.27    | 67.325   | 32.11    | 20.59    | 26.36    | 389.15   | 899.11   | 644.13   | 0.99925   | -3.2814  | 4.811477  |
| SDCBP       | VQQTAFSAPNANPALLESASAPIPHDGNL YPR | Phospho(Y)  | 268.38   | 1730.65  | 993.515  | 600.31   | 428.68   | 464.485  | 331.64   | 261.13   | 295.385  | 3466.45  | 3421.16  | 3444.025 | -1.10557  | 2.82626  | 0.339551  |
| SEC16A      | ANHSSHEQDYTGALDFLTLR              | Phospho(Y)  | 632.33   | 455.26   | 543.795  | 1362.51  | 1410.57  | 1386.54  | 1486.06  | 1200.23  | 1343.145 | 2599.55  | 2919.55  | 2919.55  | 1.363054  | -1.07426 | 1.210131  |
| SEPT2       | QOPTQFNPTFGYVGFANLQVHR            | Phospho(Y)  | 4705.35  | 18359.68 | 11532.52 | 19972.88 | 16006.96 | 17989.92 | 12308.46 | 1137.27  | 1172.87  | 14080.81 | 14678.75 | 14379.78 | 0.641482  | 0.323147 | 0.294716  |
| SEPT7       | NLEQYVGFANLQVHR                   | Phospho(Y)  | 975.01   | 2915.34  | 1945.175 | 2814.3   | 1813.54  | 2313.32  | 2545.36  | 2063.36  | 2304.21  | 2498.8   | 2104.29  | 2301.545 | 0.520439  | 0.007736 | -0.010167 |
| SEPT7       | LAATYVNGVNNK                      | Phospho(Y)  | 175.07   | 288.87   | 231.97   | 139.19   | 211.73   | 175.46   | 127.34   | 483.78   | 305.56   | 13.78    | 46.2     | 29.49    | -0.4028   | 2.54869  | -3.3469   |
| SET         | IDFYFDEPNVFEK                     | Phospho(Y)  | 576.22   | 1673.25  | 1074.735 | 1054.2   | 786.69   | 920.445  | 1606.98  | 1742.5   | 1674.74  | 901.24   | 1333.32  | 1117.28  | -0.22358  | -0.27959 | -0.58395  |
| SGK223      | QEDAPVYLGSRF                      | Phospho(Y)  | 348.6    | 321.7    | 335.15   | 1033.81  | 716.6    | 875.205  | 246.31   | 411.2    | 338.755  | 530.71   | 543.01   | 536.86   | 1.384814  | 0.705075 | 0.707533  |
| SGK223      | LNLSHSETVHDESHFYSYLSQPNR          | Phospho(Y)  | 4755.29  | 10230.43 | 7837.86  | 8494.29  | 9715.04  | 9104.65  | 9530.15  | 8313.82  | 8921.985 | 10496.92 | 7379.1   | 8938.01  | 0.272451  | 0.026262 | 0.022699  |
| SHANK2      | YSLDSELYSR                        | Phospho(Y)  | 654.59   | 406.95   | 530.77   | 736.56   | 785.35   | 760.955  | 2192.27  | 2103.08  | 2147.675 | 3865.32  | 3058.1   | 3461.71  | 0.519724  | -2.1856  | 0.688709  |
| SHANK2_Y989 | RQGMENPYSVEVK                     | Phospho(Y)  | 107.79   | 105.46   | 106.825  | 9753.6   | 8805.06  | 9279.33  | 290.68   | 164.12   | 227.4    | 7062.99  | 5753.49  | 6408.24  | 0.443403  | 0.543092 | 4.816624  |
| SHB         | GEASGMENPYEAKR                    | Phospho(Y)  | 0        | 76.77    | 0        | 76.77    | 7290.6   | 6550.37  | 7055.485 | 0        | 24.61    | 187.29   | 20.01    | 108.65   | 7.524102  | 6.023029 | 3.46246   |
| SHB         | VTIADYVSDPFDK                     | Phospho(Y)  | 10472.37 | 12626.93 | 11649.95 | 33257.84 | 34803.65 | 34030.75 | 7110.87  | 9597.13  | 8354     | 5782.31  | 7265.37  | 6533.84  | 1.548615  | 3.38836  | -3.45454  |
| SHB         | LDY36GSGEGVGQVGR                  | Phospho(Y)  | 14636.58 | 19976.34 | 17306.46 | 29817.28 | 31037.85 | 30327.57 | 1884.33  | 1569.99  | 1727.16  | 681.72   | 261.64   | 471.68   | 0.809319  | 0.006677 | -1.87522  |
| SHB         | LPQDDRRPADEQDQVWEWNR              | Phospho(Y)  | 2684.5   | 3081.88  | 2883.19  | 7191.2   | 8268.37  | 7729.785 | 1068.19  | 719.91   | 694.05   | 606.66   | 679.95   | 643.305  | 1.422762  | 3.588853 | -0.47485  |
| SHO1        | ELFDQPSYVGNLNDK                   | Phospho(Y)  | 24059.81 | 34169.18 | 29114.5  | 67417.02 | 75200.29 | 71308.66 | 42180.81 | 44599.32 | 4330.07  | 46032.36 | 5994.97  | 53043.67 | 1.22934   | 0.428997 | 0.28916   |
| SLC25A4     | AAYFGVYDTAK                       | Phospho(Y)  | 645.96   | 872.53   | 759.245  | 419.22   | 573.87   | 496.545  | 2801.7   | 2390.26  | 2595.98  | 1285.51  | 1236.68  | 1261.095 | -0.61264  | -1.34468 | -1.0416   |
| SLC25A4     | AAYFGVYDTAK                       | Phospho(Y)  | 715.7    | 799.84   | 757.77   | 899.37   | 1245.42  | 1072.395 | 1279.38  | 1259.32  | 1269.35  | 1408.48  | 1556.28  | 1482.38  | 0.501004  | -0.46708 | 0.223825  |
| SLMC3       | LFHHYVSDSEVTK                     | Phospho(Y)  | 385.6    | 311.75   | 210.175  | 343.66   | 78.24    | 210.95   | 1071.44  | 1694.69  | 1383.065 | 876.39   | 129.27   | 502.83   | 0.00531   | -1.25317 | -1.45973  |
| SRNF70      | EFVYVYKPKR                        | Phospho(Y)  | 2827.28  | 2313.79  | 2570.535 | 4058.19  | 5513.35  | 4781.065 | 3446.18  | 3458.96  | 3452.82  | 6176.58  | 4574.7   | 5375.64  | 0.898279  | -1.16629 | 0.63767   |
| SDEF        | LVYQVFIH                          | Phospho(Y)  | 118.47   | 158.17   | 138.32   | 108.28   | 145.97   | 127.125  | 947.96   | 875.11   | 911.535  | 715.04   | 589.29   | 652.165  | -0.12176  | -2.35899 | -0.48306  |
| SRCN1       | AAGGDDPFLVDGQVGR                  | Phospho(Y)  | 0        | 0        | 1        | 49.66    | 185.96   | 117.76   | 79.84    | 57.79    | 68.815   | 669.28   | 689.26   | 679.27   | 6.879706  | -2.52814 | 3.30319   |
| SRCN1       | EFLYAFRPGSHLTVGDLR                | Phospho(Y)  | 6652.68  | 6133.2   | 6493.04  | 21314.74 | 23078.79 | 22196.77 | 13433.61 | 10070.91 | 11742.36 | 18847.64 | 25559.29 | 22033.47 | 1.773339  | -0.00044 | 0.918075  |
| SRCN1       | QGLYALPDYQLHGEKR                  | Phospho(Y)  | 9946.07  | 12510    | 11228.04 | 18122.19 | 16469.55 | 17595.87 | 10231.09 | 10315.36 | 10273.23 | 11525.66 | 12933.87 | 12229.77 | 0.623222  | 0.50031  | 0.251508  |
| SRF3        | AFYGYLDR                          | Phospho(Y)  | 13.8     | 33.08    | 23.44    | 13.22    | 99.36    | 56.29    | 3255.93  | 3696.26  | 3476.095 | 2038.99  | 2314.84  | 2176.915 | 1.263906  | -0.51829 | 0.16758   |
| SRF3        | AFYGYLDR                          | Phospho(Y)  | 52.7     | 59.89    | 56.295   | 284.85   | 315.46   | 300.155  | 2583.35  | 2419.25  | 2301.3   | 1423.4   | 2080.78  | 1752.099 | 2.414629  | -2.5453  | -0.5136   |
| SSB         | PHQEYDFDNLNLR                     | Phospho(Y)  | 26.65    | 0        | 1        | 1        | 1        | 1        | 479.19   | 24.83    | 282.01   | 29.63    | 1        | 14.815   | -1.7806   | -3.8899  | -0.8935   |
| STAT3       | YCRPESDEHPADPAGAPYLK              | Phospho(Y)  | 367.5    | 1149.06  | 758.28   | 2457.45  | 2174.205 | 919.67   | 740.42   | 830.045  | 3416.69  | 4387.04  | 3901.865 | 511.9685 | -0.84368  | -0.86709 | 0.857079  |
| STAT3       | YCRPESDEHPADPAGAPYLK              | Phospho(Y)  | 1460.2   | 1442.72  | 1451.46  | 8036.11  | 6810.16  | 7423.135 | 2772.54  | 2497.64  | 2635.09  | 8658.62  | 11914.62 | 10286.62 | 2.354524  | -0.47067 | 1.964845  |
| STAT5B      | YADVYVQDK                         | Phospho(Y)  | 2740.05  | 2654.7   | 2689.375 | 7057.16  | 9935.24  | 8486.21  | 2007.33  | 1616.93  | 1912.13  | 2994.66  | 1535.58  | 2285.12  | 1.652465  | 0.92533  | 0.244007  |
| STIP1       | LAYINPLALEK                       | Phospho(Y)  | 1639.79  | 1425.06  | 1532.425 | 1053.31  | 1079.76  | 1066.535 | 3670.04  | 3305.24  | 3487.69  | 791.92   | 1044.65  | 916.285  | -0.25289  | 0.219063 | -1.9284   |
| STIP1       | LDPHNHLVSNR                       | Phospho(ST) | 742.63   | 638.95   | 690.79   | 580.46   | 246.53   | 413.495  | 3466.1   | 3765.34  | 3615.72  | 773.73   | 240.16   | 506.945  | -0.74038  | -0.29396 | -2.83438  |
| STIP1       | DFGNVYDFVYVQVPR                   | Phospho(Y)  | 67.56    | 0        | 33.78    | 44.88    | 52.91    | 48.895   | 91.33    | 213.24   | 152.295  | 676.56   | 441.77   | 559.165  | 0.533518  | -3.51552 | 1.8765    |
| SWK         | QESTYSNRYEDELAPIWAAKDGQR          | Phospho(Y)  | 1819.23  | 3655.08  | 237.605  | 3214.67  | 2739.9   | 2072.785 | 2218.62  | 1983.25  | 2068.435 | 3512.1   | 4071.65  | 3841.875 | 0.118001  | -0.37    | 0.879388  |
| TACSTD2     | AAGDVGDDAAYFER                    | Phospho(Y)  | 857.93   | 953.8    | 905.865  | 898.15   | 1286.22  | 1092.185 | 1259.85  | 1860.52  | 1560.185 | 448.83   | 780.82   | 614.825  | 0.269849  | 0.82897  | -1.34347  |
| TENC1       | GPLDQSPYVQVSRPFR                  | Phospho(Y)  | 23429.86 | 26218.83 | 24824.35 | 35446.96 | 50947.53 | 43197.25 | 9403.18  | 9587.69  | 9496.435 | 14324.96 | 15265.73 | 17495.35 | 0.799184  | 1.545796 | 0.389552  |
| TFR         | SAFNLSGGELYSR                     | Phospho(Y)  | 7983.91  | 16783.4  | 12338.66 | 20104.22 | 20335.48 | 20219.85 | 30048.62 | 27584.29 | 28916.46 | 5474.46  | 42370.38 | 38422.72 | 0.712587  | -0.92619 | 0.415067  |
| TFR         | VSASPLLYLTK                       | Phospho(Y)  | 372.7    | 949.04   | 661.32   | 613.76   | 618.55   | 616.055  | 2956.95  | 3198.32  | 3027.635 | 1410.79  | 932.1    | 1171.445 | -0.10229  | -0.92716 | -1.3699   |
| TJP2        | HPDFAVPIK                         | Phospho(Y)  | 6325.21  | 7649.28  | 6987.245 | 29794.66 | 29540.12 | 29649.39 | 21168.06 | 23960.57 | 22564.32 | 10200.43 | 8932.03  | 11565.23 | -0.208207 | -0.25219 | -1.6399   |
| TJP2        | IBAQHFDYVAVPK                     | Phospho(Y)  | 2147.77  | 1647.44  | 1897.605 | 159.66   | 231.66   | 195.66   | 5638.39  | 5929.14  | 5783.765 | 931.64   | 874.17   | 902.95   | -3.27776  | -2.20623 | -2.79396  |
| TKT         | NMAIQGERSYSGDK                    | Phospho(Y)  | 8.15     | 10.24    | 9.105    | 629.65   | 691.71   | 696.68   | 171.33   | 52.54    | 113.95   | 1707.6   | 1143.52  | 1425.56  | 0.017544  | -1.28982 | 0.670798  |
| TLN1        | ALDYMLR                           | Phospho(Y)  | 625.28   | 792.2    | 708.74   | 1083.05  | 1164.66  | 1123.855 | 1552.39  | 1602.99  | 1577.69  | 4094.7   | 6346.26  | 5200.48  | 0.665128  | -2.21573 | 1.726369  |
| TLN1        | AVSSAJQJLEHVAQGNENYAGIAAR         | Phospho(Y)  | 258.41   | 1711.41  | 984.91   | 2110.55  | 3141.92  | 2626.235 | 1859.6   | 2151.85  | 2006.725 | 1420.79  | 1303.72  | 1382.255 | 1.414932  | 0.946999 | -0.58183  |
| TLN2        | AVSSAJQJLTLCAQGNENYHGVAAAR        | Phospho(Y)  | 0        | 185.51   | 92.755   | 1674.21  | 1718.87  | 1696.54  | 35.01    | 0        | 17.505   | 828.03   | 640.47   | 734.25   | 4.193027  | 1.206252 | 5.380432  |
| TLN2        | EDYSYDGNR                         | Phospho(Y)  | 1768.7   | 2376.22  | 2072.46  | 3055.5   | 3892.69  | 3472.065 | 946.46   | 658.86   | 802.66   | 918.91   | 924.12   | 921.515  | 0.744462  | 1.913727 | 0.198219  |
| TM6SF1      | ALYQMDMK                          | Phospho(Y)  | 50.82    | 63.05    | 56.935   | 1463.58  | 1318.4   | 1318.4   | 32.35    | 95.06    | 63.705   | 98.62    | 13.99    | 56.305   | 4.533329  | -0.17814 | -0.17814  |
| TKN2        | ALPQNDHYVMGEHR                    | Phospho(Y)  | 336.02   | 231.45   | 283.735  | 58316.22 | 54862.89 | 56589.56 | 639.18   | 564.34   | 670.76   | 23483.05 | 14645.83 | 19064.44 | 1.639848  | 1.589652 | 4.395552  |
| TKN2        | KPTYDFVSDQDPLSDQFK                | Phospho(Y)  | 18051.27 | 22862.09 | 20207.13 | 54252.59 | 51946.41 | 53099.5  | 46934.06 | 54585.76 | 50759.91 | 49915.99 | 52395.46 | 51155.73 | 1.393834  | 0.053803 | 0.011206  |
| TKN2        | KVSSHTYLLRPERVYLR                 | Phospho(Y)  | 11838.38 | 13712.09 | 12775.24 | 25806.73 | 29049.58 | 27328.16 | 29620.92 | 30615.09 | 3011.01  | 24391.01 | 22846.22 | 23618.62 | 1.097038  | 0.210464 | -0.3507   |
| TNS1        | HVAYGGVYTPEDR                     | Phospho(Y)  | 2969.77  | 3342.98  | 3156.375 | 12591.7  | 7548.37  | 10070.04 | 4687.49  | 3735.99  | 4218.74  | 21270.67 | 15018.9  | 18144.79 | 1.673728  | -0.84849 | 2.107067  |
| TNS1        | HPVYVYVSGLHKK                     | Phospho(Y)  | 8152.87  | 11037.04 | 9594.395 | 19413.75 | 23584.06 | 21489.91 | 14572.04 | 13755.74 | 14163.89 | 28261.03 | 15843.53 | 22062.28 | 1.163915  | -0.03732 | 0.636364  |
| TNS3        | LSLQGVYDNGQLLFFSK                 | Phospho(Y)  | 20592.37 | 23794.46 | 22186.42 | 27014.82 | 27935.92 | 27160.37 | 11944.15 | 11047.03 | 11495.69 | 3856.69  | 4573.27  | 4244.43  | 0.291697  | 2.881263 | -         |
