# Supplementary material for: Activation of IGF1R/p110β/AKT/mTOR confers resistance to α-specific PI3K inhibition
Source: Springer Nature journal article supplement (doi:10.1186/s13058-016-0697-1), 2016-04-05
Supplement: MOESM3 [file 10028048]

|        |                           |                   |           |          |          |          |           |           |          |          |          |          |          |          |          |           |          |         |
|--------|---------------------------|-------------------|-----------|----------|----------|----------|-----------|-----------|----------|----------|----------|----------|----------|----------|----------|-----------|----------|---------|
| NUDC02 | ENPGDFSAEIGSONYTK         | Phospho(Y)        | 1631.28   | 1232.08  | 1431.68  | 443.67   | 475.17    | 459.42    | 1879.89  | 2155.88  | 2017.885 | 1025.32  | 1652.05  | 1338.685 | 0.495135 | -0.59203  | 1.542931 |         |
| NUMA1  | VESLESVLTPTIPAR           | Phospho(Y)        | 10623.98  | 13911.68 | 12267.83 | 3450.63  | 3606.77   | 3522.7    | 9599.05  | 13298.55 | 11448.8  | 9157.24  | 10352.45 | 9754.845 | -0.09968 | -0.23101  | 1.469882 |         |
| PAPSS2 | STNVVYQAHVYR              | Phospho(Y)        | 193.57    | 395.2    | 294.385  | 164.7    | 107.7     | 102.8     | 0        | 29.33    | 14.68    | 209.93   | 252.88   | 232.405  | -4.32726 | 3.986192  | 1.178205 |         |
| PARD3  | IRHSVLSYGLGDESFSR         | Phospho(Y)        | 1881.73   | 1981.98  | 1981.98  | 4683.73  | 4683.73   | 4683.73   | 4683.73  | 4683.73  | 4683.73  | 4683.73  | 4683.73  | 4683.73  | 4683.73  | 4683.73   | 4683.73  | 4683.73 |
| PARD3  | EDYVAEQDHFIR              | Phospho(Y)        | 2053.57   | 3095.84  | 2574.705 | 833.56   | 975.29    | 904.425   | 3248.07  | 4050.11  | 3649.09  | 3080.21  | 2922.37  | 3001.29  | 0.50313  | -0.28195  | 1.73051  |         |
| PARD3  | DTVIGSSAPVYR              | Phospho(Y)        | 420.74    | 806.92   | 611.83   | 187.97   | 259.37    | 219.62    | 767.75   | 1576.69  | 1172.22  | 893.24   | 1019.78  | 956.15   | 0.938041 | -0.29339  | 1.22771  |         |
| PARD6B | KEADQYSAGDTDLTK           | Phospho(Y)        | 2537.85   | 4004.52  | 3271.185 | 1973.94  | 2155.85   | 2064.96   | 4586.11  | 6757.57  | 5676.84  | 11498.28 | 14040.07 | 12758.48 | 0.795275 | 1.169392  | 2.62271  |         |
| PDAP1  | ARQYTSPEIDIAQLQAEK        | Phospho(Y)        | 0         | 13.24    | 6.62     | 146.2    | 29.72     | 78.8      | 0        | 0        | 0        | 0        | 0        | 0        | nNUM     | nHDIV01   | 2.3725   |         |
| PDLM1  | RYTQVYINRGLYSSEINFNNALESK | Phospho(Y)        | 447.38    | 1411.45  | 925.37   | 540.36   | 620.59    | 540.36    | 691.15   | 679.63   | 691.15   | 679.63   | 640.82   | 1271.805 | 0.302163 | -0.41017  | 1.09444  |         |
| PK1    | KELNYFAK                  | Phospho(Y)        | 4110.49   | 5047.24  | 4578.865 | 1495.29  | 1365.96   | 1430.625  | 1201.37  | 1731.04  | 1466.205 | 4585.46  | 4309.28  | 4447.37  | -1.6429  | 1.008866  | 1.636307 |         |
| PK1    | YFEGPEYGFVAGR             | Phospho(Y)        | 1122.65   | 2687.76  | 2255.205 | 622.4    | 732.69    | 677.345   | 864.53   | 1107.55  | 986.04   | 1896.53  | 2254.56  | 2075.545 | -1.19354 | 1.077732  | 1.615527 |         |
| PK1    | IHYVGYSMAYGPAQHAISTEK     | Phospho(Y)        | 1586.72   | 2174.61  | 1885.665 | 1039.45  | 1360.91   | 1200.18   | 1503.07  | 2419.09  | 1961.08  | 2540.61  | 2586.55  | 2053.58  | 0.056575 | 0.386512  | 1.094909 |         |
| PK1    | IQELGDLTYFAPGR            | Phospho(Y)        | 375.87    | 396.18   | 386.025  | 58.27    | 18.89     | 38.58     | 51.33    | 343.05   | 437.175  | 570.07   | 33.96    | 302.10   | 0.179517 | -0.53359  | 2.968695 |         |
| PK1    | EAGFYSVGLNSLGR            | Phospho(Y)        | 2411.07   | 2832.02  | 2621.545 | 369.05   | 513.34    | 341.195   | 7074.22  | 7601.49  | 7337.805 | 2055.54  | 2239.4   | 2147.47  | 1.484941 | -1.77272  | 2.65397  |         |
| PK1    | DOYLVMLTK                 | Phospho(Y)        | 2351.15   | 2659.64  | 2508.85  | 8957.65  | 9035.32   | 8996.95   | 27630.77 | 34401.91 | 31016.34 | 22149.87 | 24537.4  | 23339.27 | 0.302163 | -0.41017  | 1.375326 |         |
| PK1    | TRDLYMMLTK                | Phospho(Y)        | 1325.43   | 1786.69  | 1556.06  | 13.64    | 40.82     | 209.23    | 2414.99  | 4301.23  | 3538.11  | 185.86   | 184.67   | 1016.66  | 1.107952 | -1.72381  | 2.28076  |         |
| PK1    | DOYLVMLTK                 | Phospho(Y)        | 182.84    | 0        | 91.42    | 0        | 74.88     | 37.44     | 500.42   | 510.01   | 505.215  | 0        | 51.63    | 25.615   | 0.466316 | -2.9602   | -0.53637 |         |
| PK1    | EYDLYEYTR                 | Phospho(Y)        | 512.76    | 495.15   | 503.955  | 96.15    | 0.02      | 48.085    | 891.7    | 1002.87  | 947.285  | 399.02   | 292.28   | 345.65   | 0.910504 | -1.45449  | 2.846563 |         |
| PK1    | FGYHIMVEGR                | Phospho(Y)        | 5154.23   | 6854.81  | 6004.52  | 4004.48  | 3744.68   | 3899.58   | 18182.58 | 23917.74 | 21050.16 | 14193.21 | 15897.65 | 15045.43 | 1.80971  | -0.48451  | 1.959076 |         |
| PK1    | EAEAYHQLFEEELR            | Phospho(Y)        | 39.07     | 488.91   | 263.99   | 287.2    | 48.01     | 167.805   | 92.96    | 611.45   | 455.185  | 52.14    | 185.31   | 318.725  | 0.78597  | -0.51414  | 0.927247 |         |
| PK1    | NLYNDANL                  | Phospho(Y)        | 17696.18  | 17658.08 | 17677.13 | 2788.78  | 2930.68   | 2891.435  | 1607.64  | 1785.39  | 1696.515 | 10167.64 | 10167.64 | 10167.64 | -3.38124 | 2.94577   | 1.925655 |         |
| PK1    | GQYHLOAQFSRR              | Phospho(Y)        | 10422.56  | 9034.74  | 9733.15  | 16222.79 | 16632.55  | 16727.67  | 20717.13 | 22037.3  | 21377.22 | 22141.07 | 24350.18 | 23245.63 | 1.135095 | 0.120885  | 0.474723 |         |
| PK1    | ADYDYLTLR                 | Phospho(Y)        | 2568.08   | 9193.94  | 2981.01  | 5247.46  | 4980.75   | 5114.105  | 4516.89  | 4262.75  | 4389.82  | 4453.29  | 7041.12  | 547.205  | 0.607587 | -0.386899 | 0.617439 |         |
| PK1    | NNYALNTTAYEAPYRQIYR       | Phospho(Y)Phosph  | 13360.6   | 12266.58 | 17313.59 | 2111.52  | 3440.185  | 2761.185  | 8695.02  | 14271.49 | 11483.26 | 10956.68 | 17504.27 | 14230.48 | -0.59237 | 0.309452  | 3.866214 |         |
| PK1    | VHFPASTDYSTQYGLK          | Phospho(Y)        | 9091.39   | 8876.13  | 8983.76  | 4635.78  | 4182.81   | 4409.295  | 15196.08 | 20508.17 | 17852.43 | 15348.68 | 17502.94 | 16434.61 | 0.990729 | -0.11938  | 1.193817 |         |
| PK1    | AAVYSDYDHTVYR             | Phospho(Y)        | 1235.81   | 1230.51  | 1238.66  | 1018.42  | 484.94    | 278.33    | 13593.73 | 19035.79 | 14556.91 | 586.72   | 19035.79 | 19035.79 | 0.981726 | 0.32526   | 1.941141 |         |
| PK1    | LHQOQLYSQDDSNR            | Phospho(Y)        | 975.98    | 1332.37  | 1154.175 | 390.71   | 285.08    | 331.895   | 49.75    | 1624.34  | 837.045  | 650.98   | 1718.17  | 1184.575 | -0.46348 | 0.500992  | 1.835751 |         |
| PK1    | NNYALNTTAYEAPYRQIYR       | Phospho(Y)        | 33.86     | 46.48    | 40.17    | 9400.45  | 12.92     | 4706.6685 | 236.27   | 2022.11  | 219.19   | 3129.697 | 0.07     | 15634.77 | 2.447992 | 0.165632  | 1.375131 |         |
| PK1    | LHQOQLYSQDDSNR            | Phospho(Y)        | 18435.08  | 23116.12 | 20775.6  | 4591.74  | 8352.59   | 6472.165  | 11857.61 | 13360.62 | 12332.07 | 15162.9  | 19200.99 | 10920.99 | -0.72042 | 0.606713  | 1.58886  |         |
| PK1    | TYSPVYR                   | Phospho(Y)        | 592.05    | 630.62   | 611.335  | 455.66   | 520.63    | 488.145   | 116.35   | 44.62    | 80.485   | 1157.26  | 1041.14  | 1099.7   | -2.92517 | 3.772246  | 1.171728 |         |
| PK1    | NYENIVMLQCK               | Phospho(Y)        | 1801.19   | 1477.33  | 1477.33  | 490.32   | 907.02    | 207.09    | 2692.37  | 238.73   | 238.73   | 180.18   | 181.36   | 181.36   | 0.764317 | -0.39179  | 1.233616 |         |
| PK1    | PLCG1                     | Phospho(Y)        | 2058.26   | 4732.32  | 3395.29  | 1353.03  | 1857.2    | 1580.115  | 3744     | 5685.11  | 4714.555 | 2267.35  | 3019.77  | 2943.56  | 0.474856 | -0.07     | 0.733033 |         |
| PK1    | PLEKHA5                   | Phospho(Y)        | 6190.21   | 7156.74  | 6673.475 | 1568.19  | 2052.5    | 1810.345  | 7216.31  | 8092.07  | 7052.19  | 7624.37  | 6580.23  | 7102.3   | 0.197817 | -0.10796  | 1.97222  |         |
| PK1    | PLEKHA6                   | Phospho(Y)        | 133.65    | 893.92   | 513.785  | 31.9     | 0         | 15.95     | 0        | 68.25    | 34.125   | 136.17   | 25.67    | 80.92    | -3.91226 | 1.245667  | 2.34294  |         |
| PK1    | PLEKHA6                   | Phospho(Y)        | 16790.94  | 15466.79 | 16128.87 | 3674.3   | 5504.14   | 4589.22   | 2211.92  | 26937.19 | 2825.06  | 13402.42 | 17905.54 | 15653.98 | 0.604611 | -0.64773  | 1.770209 |         |
| PK1    | PLEKHA7                   | Phospho(Y)        | 534.04    | 888.47   | 711.255  | 1650.74  | 2280.36   | 1965.55   | 745.34   | 63.78    | 40.56    | 593.45   | 34.04    | 313.745  | -0.47401 | -0.36676  | -2.64727 |         |
| PK1    | PDF1B                     | Phospho(Y)        | 989.07    | 941.62   | 956.845  | 191.4    | 449.65    | 315.325   | 1252.44  | 345.16   | 335.94   | 2640.245 | 2431.64  | 3380.08  | 0.30836  | 0.10714   | 0.33384  |         |
| PK1    | PDFDF                     | Phospho(Y)        | 1889.39   | 1073.07  | 1481.23  | 47.48    | 156.13    | 101.805   | 1946.51  | 3112.33  | 2529.42  | 4.46     | 284.73   | 144.595  | 0.772011 | -0.14272  | 0.506209 |         |
| PK1    | PPR12A                    | Phospho(Y)        | 1569.37   | 1656.89  | 1613.13  | 592.71   | 419.9     | 506.305   | 959.21   | 1603     | 1281.105 | 2076.62  | 1968.02  | 2022.32  | -0.33247 | 0.658623  | 1.997933 |         |
| PK1    | PRKD2                     | Phospho(Y)        | 3127.05   | 3415.73  | 3271.39  | 1802.23  | 1940.78   | 1871.505  | 3396.74  | 2906.17  | 3151.455 | 2472.31  | 3155.43  | 2964.22  | -0.05389 | -0.0837   | 0.636454 |         |
| PK1    | PLRL                      | Phospho(Y)        | 3350.01   | 8564.99  | 5957.5   | 190.11   | 206.07    | 198.09    | 1626.7   | 2202.61  | 1914.655 | 400.42   | 768.23   | 584.325  | -1.63762 | -1.71224  | 1.566015 |         |
| PK1    | PRF4B                     | Phospho(Y)        | 227023    | 3004679  | 2893458  | 2234556  | 224797    | 2259475   | 2187429  | 2970725  | 2476373  | 272631   | 303298   | 3098.96  | 0.37443  | 0.158828  | 0.319658 |         |
| PK1    | PSMA2                     | Phospho(Y)        | 1638.43   | 1613.83  | 1626.13  | 569.14   | 479.18    | 524.16    | 1278.45  | 750.69   | 1245.79  | 1808.18  | 1526.95  | 1526.95  | -0.68057 | 0.589817  | 1.542607 |         |
| PK1    | PSMC1                     | Phospho(Y)        | 238.66    | 450.58   | 344.62   | 0        | 123.94    | 91.97     | 562.42   | 20.08    | 29.28    | 27.22    | 0        | 13.61    | -0.32766 | -4.42461  | -1.1869  |         |
| PK1    | TBP1                      | Phospho(Y)        | 1260.41   | 1090.14  | 1175.275 | 855      | 549.08    | 702.04    | 1765.56  | 1740.99  | 1753.275 | 1886.95  | 1751.64  | 1575.04  | 0.577054 | -0.00135  | 1.319081 |         |
| PK1    | PTK2                      | Phospho(Y)        | 9001.25   | 6945.28  | 7973.265 | 1926.55  | 2188.12   | 2057.339  | 8360.61  | 12064.72 | 10212.67 | 6181.27  | 6700.43  | 6443.385 | 0.357117 | -0.66469  | 1.64848  |         |
| PK1    | PTK2                      | Phospho(Y)        | 31158.74  | 37711.13 | 34348.92 | 5383.5   | 7552.72   | 6468.11   | 28911.55 | 30478.9  | 29545.23 | 25319.74 | 31450.44 | 28387.62 | -0.22095 | -0.05796  | 2.133616 |         |
| PK1    | PTK2                      | Phospho(Y)        | 918.07    | 941.62   | 956.845  | 191.4    | 449.65    | 315.325   | 1252.44  | 345.16   | 335.94   | 2640.245 | 2431.64  | 3380.08  | 0.30836  | 0.10714   | 0.33384  |         |
| PK1    | PTK2                      | Phospho(Y)        | 6786.32   | 7420.6   | 7103.46  | 355.99   | 2682.84   | 1519.415  | 12479.67 | 1379     | 6429.485 | 0        | 302.65   | 10.14382 | -0.48098 | -3.32789  | 3.14779  |         |
| PK1    | PTK6, Y447                | Phospho(Y)        | 1154.79   | 795.95   | 975.37   | 137.65   | 144.28    | 140.56    | 971.08   | 1019.31  | 986.19   | 1388.98  | 1110.3   | 1249.64  | 0.02903  | 0.328461  | 0.328461 |         |
| PK1    | PTPN11                    | Phospho(Y)        | 3276.32   | 32628.85 | 32452.59 | 16498.24 | 19676.24  | 18087.24  | 6114.86  | 7533.583 | 6824.27  | 97641.26 | 118131.9 | 107886.6 | 1.072341 | 0.60769   | 1.652633 |         |
| PK1    | PTPN11                    | Phospho(ST)Phosph | 728720.31 | 229067.6 | 478989.3 | 6880.48  | 11190.935 | 52        | 383085.4 | 473908.6 | 424987   | 110205.8 | 459382.2 | 283019   | -0.16042 | -0.59839  | 2.657237 |         |
| PK1    | PTPN11                    | Phospho(Y)        | 1165.52   | 1196.72  | 1181.13  | 1441.73  | 1627.46   | 1634.095  | 541.34   | 8.74     | 21.67    | 3767.67  | 119.24   | 585.31   | 0.21044  | 2.2091    | 0.250132 |         |
| PK1    | PTPR                      | Phospho(Y)        | 6791.49   | 9191.71  | 7989.16  | 49560.43 | 48448.9   | 49049.67  | 6872.25  | 114709.1 | 100700.7 | 46929.46 | 52623.97 | 51626.74 | 0.33     |           |          |         |

|            |                                     |                  |          |          |          |          |          |          |          |          |          |          |          |          |          |          |          |
|------------|-------------------------------------|------------------|----------|----------|----------|----------|----------|----------|----------|----------|----------|----------|----------|----------|----------|----------|----------|
| TJP1       | YEPIQATPPPPPLSQYAQSPQVTSASLHIHKS    | Phospho(Y)       | 0.01     | 1578.22  | 789.115  | 0        | 967.73   | 483.865  | 263.73   | 246.09   | 254.91   | 24.02    | 263.03   | 143.525  | -1.63025 | -0.82869 | -1.7533  |
| TJP2       | HPDIYAVPIK                          | Phospho(Y)       | 27595    | 29061.03 | 28328.02 | 14182.88 | 16772.32 | 15477.6  | 25192.96 | 37003.94 | 31098.45 | 68659.48 | 49089.94 | 58874.71 | 0.134613 | 0.920805 | 1.927466 |
| TJP2       | IEIQKHDPDIYAVPIK                    | Phospho(Y)       | 2181.37  | 2652.32  | 2416.845 | 29.39    | 205.37   | 117.38   | 362.25   | 507.48   | 434.865  | 41.05    | 1554.84  | 797.945  | -2.47449 | 0.875722 | 2.765103 |
| TLN1       | AVSSIAIQLLGEVAQGNENYAGIAAR          | Phospho(Y)       | 1112     | 2039.13  | 1575.565 | 812.46   | 874.6    | 843.53   | 1108.6   | 1828.02  | 1468.31  | 418.08   | 971.27   | 694.675  | -0.10771 | -1.07975 | -0.2801  |
| TLN1, Y71  | ALDYMYLR                            | Phospho(Y)       | 838.21   | 947.39   | 892.8    | 46.76    | 69.75    | 58.255   | 1845.54  | 3619.58  | 2732.56  | 3104.72  | 2962.65  | 3033.685 | 1.618844 | 1.050818 | 5.702546 |
| TMEM106B   | NGDVSOFPVVEFTGR                     | Phospho(Y)       | 1928.57  | 1869.63  | 1899.1   | 623.39   | 746.95   | 685.17   | 892.99   | 1524.19  | 1208.59  | 95.32    | 1368.42  | 1160.81  | -0.65199 | -0.05819 | 0.760598 |
| TMEM127    | MYAPGGAGLPGGR                       | Phospho(Y)       | 12142.1  | 9262.56  | 10702.33 | 1160.94  | 1187.58  | 1174.26  | 11324.08 | 14522.19 | 12923.14 | 4099.66  | 4571.2   | 4335.43  | 0.272031 | -1.57571 | 1.884423 |
| TMEM134    | LRVONLENDGSAQASPEPDGGVGTGR          | Phospho(Y)       | 1686.73  | 1475.88  | 1581.305 | 675.43   | 772.39   | 723.91   | 2363.93  | 2291.25  | 2327.59  | 2260.72  | 1724.93  | 1982.829 | 0.557721 | -0.22402 | 1.460933 |
| TMEM192    | AKPEPDLLEEKIYAFPSNITSETGFR          | Phospho(Y)       | 3557.36  | 4569.11  | 4063.235 | 57.67    | 125.56   | 91.615   | 2161.49  | 2219.08  | 2220.285 | 3235.9   | 4000.54  | 3618.22  | -0.86494 | 0.71759  | 5.303552 |
| TMEM192    | IYAFPSNITSETGFR                     | Phospho(Y)       | 3302.7   | 489.57   | 1896.135 | 1479.52  | 460.17   | 969.845  | 3146.43  | 15913.57 | 9530     | 14696.46 | 4530.38  | 9613.42  | 2.329415 | 0.012574 | 3.309224 |
| TMEM38B    | IVGGYTHANSYKNGWVMAIGWARAGGAGTIITNFR | Phospho(ST)Phosp | 970.72   | 112.11   | 541.415  | 5884.69  | 6439.19  | 6161.94  | 10.57    | 1610.08  | 810.325  | 6287.01  | 28.91    | 3157.96  | 0.581766 | 1.96242  | -0.96439 |
| TNK2       | VSTHYLLPERPSYLER                    | Phospho(Y)       | 19407.83 | 27405.26 | 23405.55 | 10592.15 | 10258.74 | 10425.45 | 20937.27 | 24488.61 | 22712.94 | 27132.9  | 2562.96  | 26492.93 | -0.0434  | 0.222093 | 1.345498 |
| TNK2       | KPTVDPVSEODPLSSDFKR                 | Phospho(Y)       | 17824.39 | 22080.07 | 19952.23 | 14269.42 | 13795.84 | 14032.63 | 14958.84 | 26363.85 | 20661.35 | 33603.92 | 26692.53 | 30148.23 | 0.050384 | 0.545139 | 1.103288 |
| TNK2       | ALPONDHDHYVMQEHF                    | Phospho(Y)       | 14724.48 | 17613.85 | 16169.17 | 5183.7   | 6382.24  | 5762.97  | 19308.01 | 20687.01 | 19997.51 | 16808.17 | 6493.06  | 11650.62 | 0.306575 | -0.77941 | 1.010524 |
| TNK2       | KPTVDPVSEODPLSSDFK                  | Phospho(Y)       | 22431.81 | 24095.76 | 23259.79 | 17744.76 | 19856.58 | 18900.67 | 33035.19 | 43177.3  | 38106.25 | 30518.29 | 44946.8  | 37732.55 | 0.712252 | -0.01422 | 1.005025 |
| TNK2       | YATPOVIAQPGFR                       | Phospho(Y)       | 1059.54  | 1009.83  | 1034.685 | 870.64   | 1244.03  | 1057.35  | 785.47   | 1087.99  | 936.73   | 7.49     | 1106.57  | 557.03   | -0.14349 | -0.74988 | -0.92461 |
| TNS3       | LSLGGYDNDAGGQLPFSK                  | Phospho(Y)       | 2326.86  | 2902.37  | 2614.615 | 2552.67  | 2993.39  | 2773.13  | 2481.23  | 3432.73  | 2956.98  | 1989.75  | 3265.51  | 2627.63  | 0.177256 | -0.17036 | -0.07775 |
| TOM1L2     | TVTVEDPQAVGGLASALDNR                | Phospho(Y)       | 3328.46  | 3763.69  | 3546.075 | 4257.62  | 4514.05  | 4385.835 | 2982.85  | 3099.73  | 3041.29  | 5175.24  | 4913.05  | 5044.145 | -0.22154 | 0.729926 | 0.201758 |
| TOM1L2     | KTVTVEDPQAVGGLASALDNRK              | Phospho(Y)       | 4861.06  | 4759.47  | 4810.265 | 3347.74  | 3005.59  | 3176.665 | 2515.71  | 3076.46  | 2796.085 | 5331.47  | 5301.32  | 5316.395 | -0.78271 | 0.92704  | 0.742935 |
| TOM1L2     | KTVTVEDPQAVGGLASALDNR               | Phospho(Y)       | 7876.85  | 10576.82 | 9226.835 | 9320.5   | 10138.96 | 9723.73  | 8668.05  | 11613.56 | 10150.81 | 11116.85 | 16501.4  | 13808.13 | 0.137686 | 0.444028 | 0.50515  |
| TPCN1      | ELKPETISSPGVHLIR                    | Phospho(Y)       | 11.54    | 359.11   | 185.325  | 205.01   | 128.54   | 166.776  | 18.39    | 295.91   | 157.15   | 279.84   | 324.82   | 302.33   | -0.23792 | 0.943982 | 0.858221 |
| TRIM25     | FDYIYQILK                           | Phospho(Y)       | 775.4    | 930.17   | 852.785  | 398.61   | 359.35   | 378.98   | 774.94   | 1087.15  | 931.045  | 621.53   | 1199.08  | 910.305  | 0.126669 | -0.0325  | 1.264228 |
| TRIM28     | VFPGSTTDLYNLIVIER                   | Phospho(Y)       | 960.23   | 1910.73  | 1435.48  | 78.85    | 133.05   | 105.95   | 1203.33  | 940.53   | 1071.93  | 732.35   | 918.13   | 825.24   | -0.42132 | -0.37733 | 2.96143  |
| TRIP6      | QAVPEPPPPAYR                        | Phospho(Y)       | 3418.6   | 3602.72  | 3510.66  | 1228.08  | 1166.08  | 1197.08  | 3613.46  | 4081.37  | 3847.415 | 6525.23  | 6706.49  | 6615.86  | 0.132147 | 0.782039 | 2.466409 |
| TRIP6      | VNFQPLPSEQCYYQAPGGPEDR              | Phospho(Y)       | 6825.62  | 7411.7   | 7118.86  | 1553.15  | 2657.88  | 2105.515 | 5581.82  | 6642.82  | 6112.32  | 5912.02  | 8915.18  | 7413.6   | -0.21989 | 0.278454 | 1.816001 |
| TUBA1C     | VGIIYQPTTVPGGDLAK                   | Phospho(Y)       | 2864.05  | 3039.7   | 2951.875 | 4369.87  | 4259.32  | 4310.095 | 4463.51  | 5346.92  | 4933.715 | 4311.02  | 3364.27  | 3637.645 | 0.732244 | -0.35365 | -0.1675  |
| TUBA1C     | IHFPLATYAFVISAEK                    | Phospho(Y)       | 3840.4   | 5141.02  | 4490.71  | 8395.85  | 7853.09  | 8124.47  | 3868.27  | 4232.39  | 4050.33  | 4033.49  | 4528.67  | 4281.08  | -0.1489  | 0.079935 | -0.3243  |
| TUBA1C     | HLFPEQLITKEDKAANNYAR                | Phospho(Y)       | 9.07     | 301.61   | 155.34   | 420.64   | 611.88   | 516.27   | 59.12    | 29.95    | 44.535   | 171.49   | 141.51   | 159.28   | -1.80242 | 1.838554 | -1.69653 |
| TUBA4A     | FDLMYAK                             | Phospho(Y)       | 529.14   | 727.11   | 628.125  | 340.11   | 305.84   | 322.975  | 224.63   | 142.53   | 183.58   | 671.49   | 1124.71  | 898.1    | -1.77464 | 2.290464 | 1.76454  |
| TUBB4B     | INYYNEATGGK                         | Phospho(Y)       | 1449.5   | 1618.22  | 1533.86  | 854.3    | 1262.46  | 1058.38  | 1569.53  | 1971.11  | 1770.32  | 2902.12  | 2079.48  | 2490.8   | 0.206843 | 0.492599 | 1.234751 |
| TUBB4B     | NSSYFVWIPMNVK                       | Phospho(Y)       | 3065.71  | 4463.75  | 3761.73  | 5442.1   | 5316.8   | 5380.45  | 4307.17  | 4067.84  | 4187.505 | 4672.71  | 4574.39  | 4623.55  | 0.153545 | 0.14291  | -0.21873 |
| TYK2       | LLAQAEQPCYR                         | Phospho(Y)       | 118140.5 | 71076.62 | 94608.57 | 46442.42 | 47892.45 | 47162.44 | 77620.42 | 82071.63 | 79846.03 | 98265.81 | 103716.3 | 101001   | 0.24475  | 0.338078 | 1.09866  |
| UBAP2L     | FPDLYSIFPTPTPLTLGR                  | Phospho(Y)       | 328.77   | 2246.11  | 1287.44  | 782.38   | 1316.24  | 959.31   | 1703.87  | 235.53   | 969.7    | 1684.01  | 3979.48  | 2831.745 | -0.40889 | 1.546081 | 1.561622 |
| UBR5       | AATAPSSTTPAASSAGLVIDPSNLR           | Phospho(Y)       | 1589.23  | 3026.76  | 2307.995 | 5474.93  | 3720.9   | 4597.915 | 1601.08  | 2338.78  | 1969.93  | 3320.46  | 3186.35  | 3253.405 | -0.2285  | 0.723806 | -0.49903 |
| UGDH       | AVQALCAVYEHVWR                      | Phospho(Y)       | 398      | 0        | 199      | 21.06    | 15.52    | 18.29    | 246.44   | 475.29   | 360.865  | 0        | 445.89   | 222.945  | 0.858691 | -0.69477 | 3.607561 |
| UGDH       | INAWNSPTLPIYEPGLK                   | Phospho(Y)       | 1320.13  | 1820.03  | 1570.08  | 1517.15  | 1500.17  | 1508.66  | 2270.55  | 2909.21  | 2589.88  | 1887.25  | 1716.63  | 1806.94  | 0.722047 | -0.51534 | 0.260281 |
| USPY       | FNDYFETPR                           | Phospho(Y)       | 65.29    | 463.07   | 264.18   | 128.14   | 211.83   | 169.895  | 0        | 1        | 0.5      | 291.55   | 55.26    | 173.415  | -0.04538 | 8.438085 | 0.02967  |
| VASP       | VQIYHNFTANSFR                       | Phospho(Y)       | 13689.34 | 14283.47 | 13984.41 | 3681.68  | 4882.89  | 4282.285 | 20377.36 | 20952.56 | 20664.96 | 27543.77 | 27563.63 | 27553.7  | 0.563161 | 0.415059 | 2.685793 |
| VT1B       | YGIYAVENHMR                         | Phospho(Y)       | 6971.51  | 6747.16  | 6859.335 | 1245.09  | 931.72   | 1088.405 | 6816.23  | 6228.13  | 6522.18  | 3233.01  | 3598.32  | 3415.665 | -0.07271 | -0.93319 | 1.649951 |
| WASL       | VIVDFIEK                            | Phospho(Y)       | 57085.82 | 66965.58 | 62025.7  | 27756.28 | 25935.93 | 26846.11 | 36158.86 | 74845.98 | 55502.42 | 43509.87 | 41851    | 42680.44 | -0.16032 | -0.37898 | 0.688862 |
| WDR1       | AHDGGYVIAWSPDSTHLLSASGDK            | Phospho(Y)       | 0        | 1210.27  | 605.135  | 434.32   | 879.26   | 656.79   | 22.65    | 0        | 11.325   | 1055.23  | 73.99    | 564.61   | -5.73967 | 5.639672 | -0.21818 |
| YBX1       | RPQYNSPPVQGEVMEGADNQGAGEQGRPVR      | Phospho(Y)       | 497.62   | 554.73   | 526.175  | 929.31   | 785.12   | 857.215  | 2538.52  | 2825.84  | 2892.18  | 3452.03  | 1493.29  | 2472.66  | 2.349791 | -0.11734 | 1.528335 |
| YES1       | LDNGGYVITTR                         | Phospho(Y)       | 2093.14  | 78.3     | 1083.72  | 89.89    | 48.61    | 69.25    | 1629.34  | 1452.6   | 1540.97  | 113.89   | 1787.26  | 950.575  | 0.505187 | -0.89697 | 3.778914 |
| YES1       | KLDNGGYVITTR                        | Phospho(Y)       | 1145.77  | 1668.15  | 1406.96  | 420.64   | 458.65   | 439.645  | 891.89   | 61.58    | 476.735  | 2913.09  | 2465.5   | 2689.295 | -1.56132 | 2.49569  | 2.612817 |
| YES1       | KDPDERPTEFYIQSFLEDYFTATEPYQYQGENL   | Phospho(Y)       | 2151.96  | 102478.8 | 61998.36 | 8715.36  | 12751.16 | 10733.26 | 15124.53 | 5189.83  | 10157.18 | 29950.69 | 54071.63 | 42011.16 | -2.60973 | 2.048273 | 1.966884 |
| YES1, Y416 | LIEDNETAR                           | Phospho(Y)       | 903.62   | 1402.82  | 1153.22  | 0        | 0.9      | 0.45     | 208.91   | 36.71    | 122.81   | 2460.54  | 80.74    | 1270.64  | -3.23117 | 3.371055 | 11.46334 |
| ZDHHC5     | GVSPSEPGPTAPVLR                     | Phospho(Y)       | 420.09   | 591.76   | 505.925  | 1329.64  | 1922.1   | 1625.87  | 853.94   | 192.1    | 426.99   | 0        | 587.7    | 793.85   | -0.24472 | 0.894664 | -1.03427 |
| ZNF185     | GALADYEGKDVATR                      | Phospho(Y)       | 1782.59  | 1757.12  | 1774.858 | 368.64   | 616.92   | 492.78   | 1826.8   | 1681.38  | 1754.09  | 177.93   | 1699.33  | 936.63   | -0.01698 | -0.90209 | 0.929613 |
