# Supplementary material for: Activation of IGF1R/p110β/AKT/mTOR confers resistance to α-specific PI3K inhibition
Source: Springer Nature journal article supplement (doi:10.1186/s13058-016-0697-1), 2016-04-05

# Leroy *et al.* Additional file 5

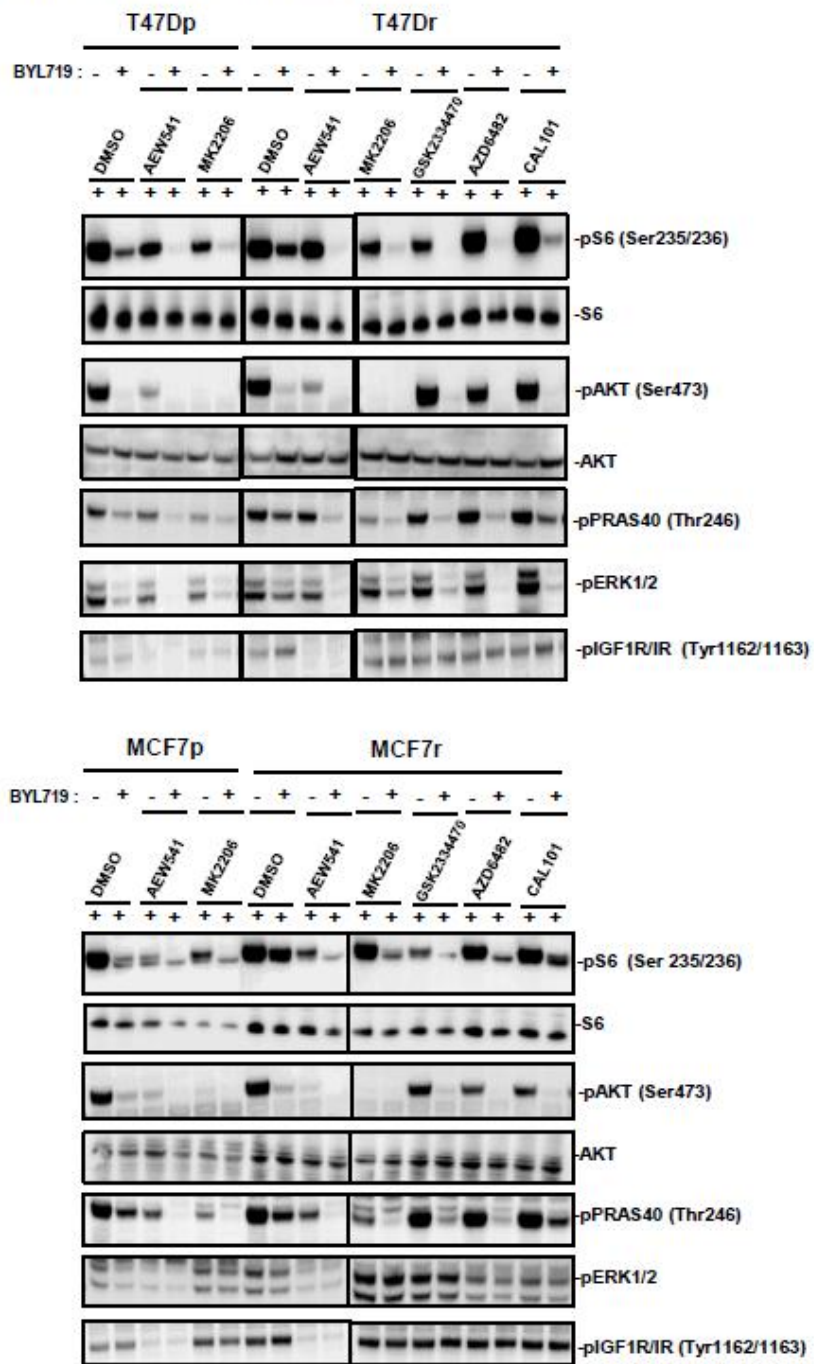

Supplement: MOESM5 [file 10028048]
